# Supplementary material for: Hydrothermal synthesis and structural characterization of several complex rare earth tantalates: Ln2TaO5(OH) (Ln = La, Pr) and Ln3Ta2O9(OH) (Ln = Pr, Nd)
Source: Royal Society of Chemistry journal article supplement (doi:10.1039/c9dt00059c), 2019-01-01
Supplement: c9dt00059c1.pdf [file c9dt00059c1.pdf]

ELECTRONIC SUPPLEMENTARY INFORMATION

**Hydrothermal Synthesis and Structural Characterization of Several Complex Rare Earth Tantalates:  $Ln_2TaO_5(OH)$  ( $Ln = La, Pr$ ) and  $Ln_3Ta_2O_9(OH)$  ( $Ln = Pr, Nd$ )**

Liurukara D. Sanjeewa, Kyle Fulle, Colin D. McMillen, Joseph W. Kolis\*

*Department of Chemistry and Center for Optical Materials Science and Engineering Technologies (COMSET), Clemson University, Clemson, South Carolina 29634-0973, USA*

**Table SI 1:** EDX data of  $Ln_2TaO_5(OH)$  ( $Ln = La, Pr$ ) and  $Ln_3Ta_2O_9(OH)$  ( $Ln = Pr, Nd$ ) series of compounds.

**Figure SI 1:** IR spectra of  $Ln_2TaO_5(OH)$  ( $Ln = La, Pr$ ) and  $Ln_3Ta_2O_9(OH)$  ( $Ln = Pr, Nd$ ) series of compounds.

**Figure SI 2:** Absorption spectra of (a)  $Pr_3Ta_2O_9(OH)$  and (b)  $Nd_3Ta_2O_9(OH)$  in the visible region.

**Figure SI 3.** Absorption spectra of (a)  $Pr_3Ta_2O_9(OH)$  and (b)  $Nd_3Ta_2O_9(OH)$  extending into the UV region.

**Table SI 1:** EDX data of  $Ln_2TaO_5(OH)$  ( $Ln = La, Pr$ ) and  $Ln_3Ta_2O_9(OH)$  ( $Ln = Pr, Nd$ ) series of compounds.

| $La_2NbO_5(OH)$ |          | $La_2TaO_5(OH)$ |          | $Pr_2TaO_5(OH)$ |          | $Pr_3Ta_2O_9(OH)$ |          | $Nd_3Ta_2O_9(OH)$ |          |
|-----------------|----------|-----------------|----------|-----------------|----------|-------------------|----------|-------------------|----------|
| Element         | Atomic % | Element         | Atomic % | Element         | Atomic % | Element           | Atomic % | Element           | Atomic % |
| La              | 20.8     | La              | 20.2     | Pr              | 20.1     | Pr                | 19.8     | Nd                | 19.1     |
| Nb              | 11.3     | Ta              | 11.6     | Ta              | 11.7     | Ta                | 12.9     | Ta                | 13.1     |
| O               | 67.9     | O               | 68.2     | O               | 67.2     | O                 | 67.3     | O                 | 67.8     |

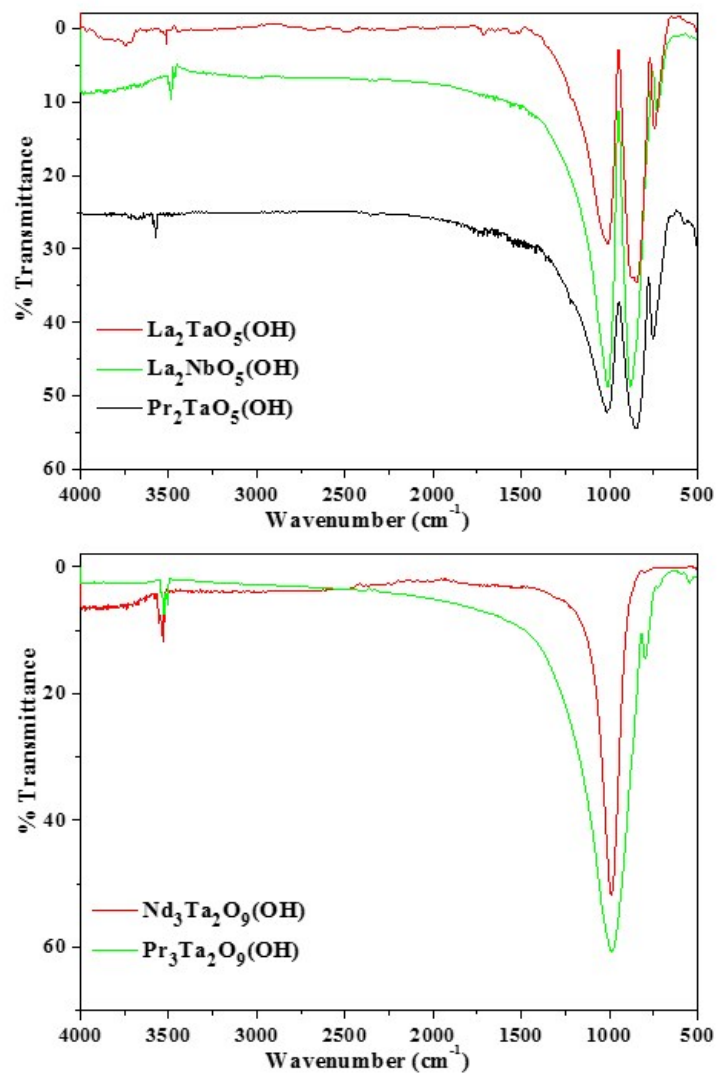

**Figure SI 1:** IR spectra of  $Ln_2TaO_5(OH)$  ( $Ln = La, Pr$ ) and  $Ln_3Ta_2O_9(OH)$  ( $Ln = Pr, Nd$ ) series of compounds.

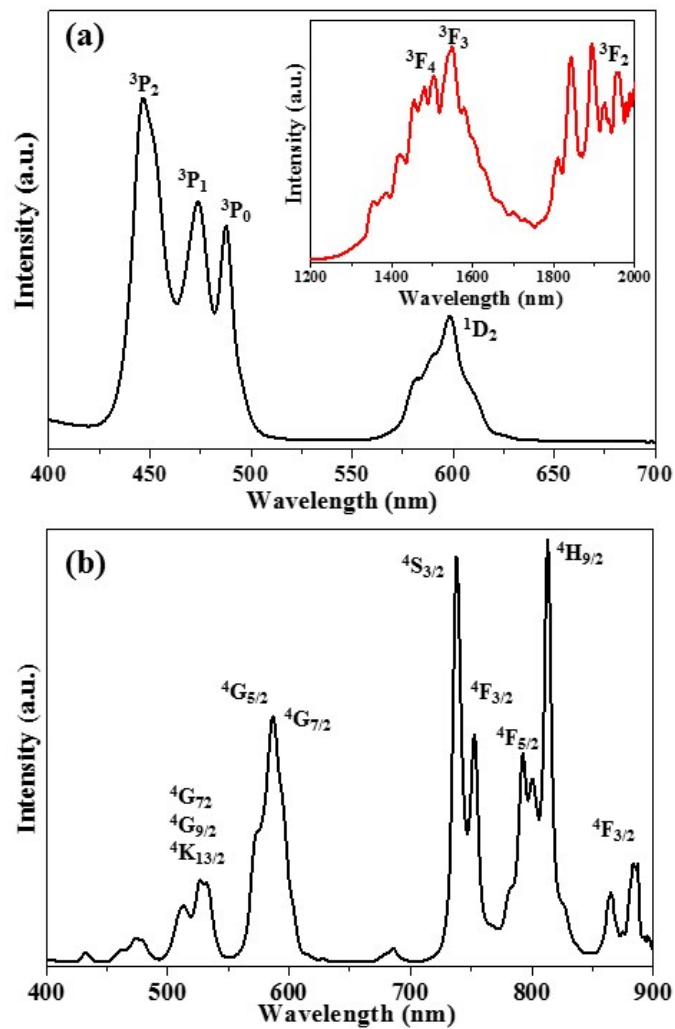

**Figure SI 2.** Absorption spectra of (a)  $\text{Pr}_3\text{Ta}_2\text{O}_9(\text{OH})$  and (b)  $\text{Nd}_3\text{Ta}_2\text{O}_9(\text{OH})$ .

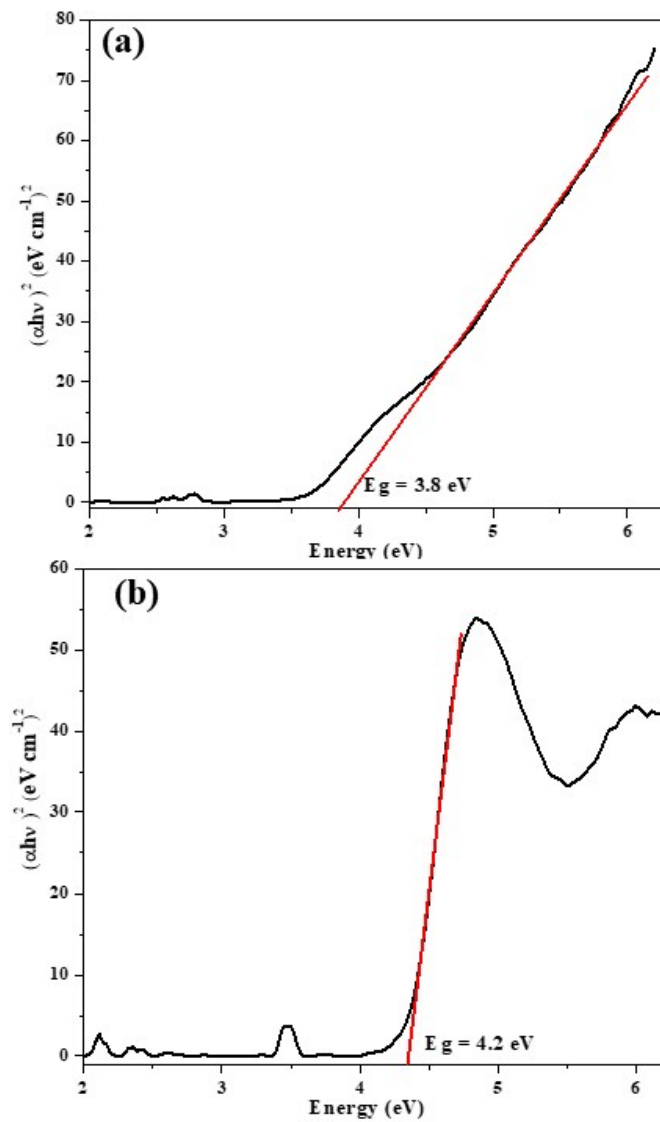

**Figure SI 3.** Absorption spectra of (a)  $\text{Pr}_3\text{Ta}_2\text{O}_9(\text{OH})$  and (b)  $\text{Nd}_3\text{Ta}_2\text{O}_9(\text{OH})$  extending into the UV region.
